# Supplementary material for: Phytogenic Generation of NiO Nanoparticles Using Stevia Leaf Extract and Evaluation of Their In-Vitro Antioxidant and Antimicrobial Properties
Source: MDPI journal article supplement (doi:10.3390/biom10010089), 2020-01-06
Supplement: s1 [file s1]

## Supplementary Material

# Phytogenic Generation of NiO Nanoparticles Using Stevia Leaf Extract and Evaluation of Their In-Vitro Antioxidant and Antimicrobial Properties

Saiganesh Srihasam <sup>1,†</sup>, Krishnan Thyagarajan <sup>2,†</sup>, Mallikarjuna Korivi <sup>3,\*</sup>, Veeranjaneeya Reddy Lebaka <sup>4,5,\*</sup> and Siva Pratap Reddy Mallem <sup>6,\*</sup>

<sup>1</sup> Department of Physics, Jawaharlal Nehru Technological University, Anantapur, Anantapuramu 515 002, India; srihasamsaiganesh@gmail.com

<sup>2</sup> Department of Physics, Jawaharlal Nehru Technological University, Pulivendula 516 390, India; ktrjntu@gmail.com

<sup>3</sup> Exercise and Metabolism Research Center, College of Physical Education and Health Sciences, Zhejiang Normal University, Jinhua 321004, Zhejiang, China

<sup>4</sup> Department of Food Science and Technology, Yeungnam University, Gyeongsan Gyeongbuk 38541, Korea

<sup>5</sup> Department of Microbiology, Yogi Vemana University, Kadapa, Andhra Pradesh-516003, India

<sup>6</sup> School of Electronics Engineering, Kyungpook National University, Daegu 41566, Korea

\* Correspondence: mallik.k5@gmail.com (M.K.); lvereddy@yahoo.com (V.R.L.); dr.mspreddy@gmail.com\_ (S.P.R.M.)

† These authors contributed equally to this work.

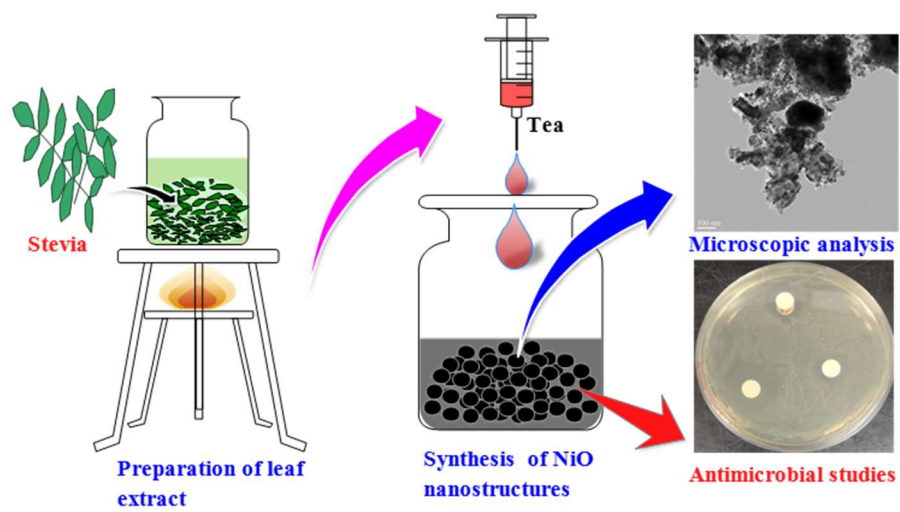

Figure S1. Schematic representation of NiO NPs using Stevia leaf extract.

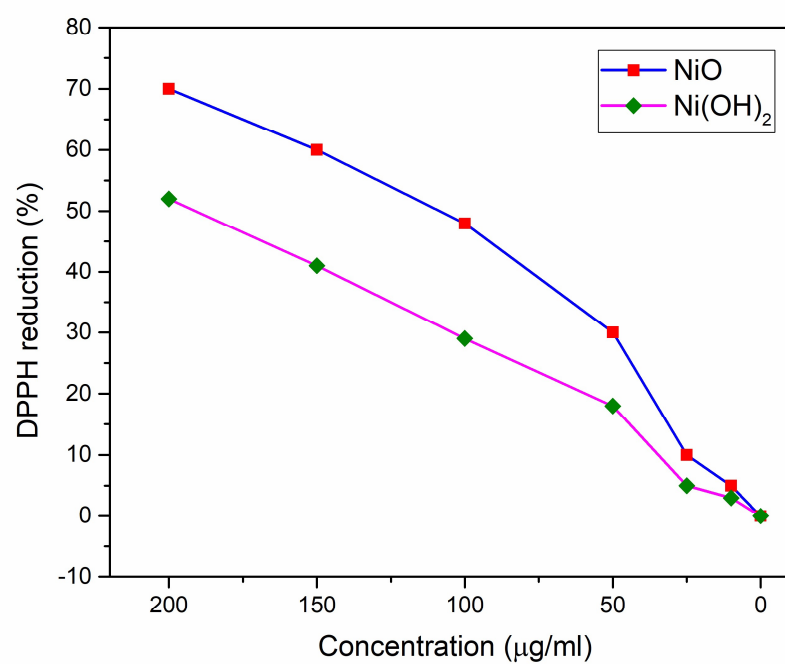

Figure S2. DPPH reduction pattern of NiO-NPs at different concentrations.
